# Supplementary material
Source: HighWire-hosted journal article supplement (https://bmjopen.bmj.com/content/14/5/e082562)
Supplement: inline-supplementary-material-1 [file inline-supplementary-material-1.pdf]

Supplementary Material 4 - Participant Consent Form

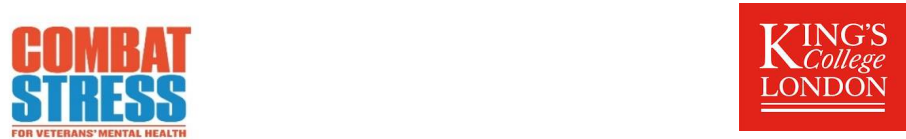

Patient Identification Number for this study:

Consent Form

Psychological treatment for moral injury in UK Armed Forces Veterans

Name of researcher: Dr Victoria Williamson & Prof Dominic Murphy

Please initial box

|                                                                                                                                                                                                                                                                                                                            |  |
|----------------------------------------------------------------------------------------------------------------------------------------------------------------------------------------------------------------------------------------------------------------------------------------------------------------------------|--|
| 1. I confirm that I have read and understood the information sheet and privacy notice for the above study [Veteran Patient Information Sheet V3 07.07.23 & Patient Privacy Notice Statement 14.4.23 V1.] I have had the opportunity to consider the information, ask questions and have had these answered satisfactorily. |  |
| 2. I understand that my participation is voluntary and that I am free to stop participating at any time without giving any reason, without my care or legal rights being affected.                                                                                                                                         |  |
| 3. I understand I have until 1 month after data collection to withdraw my data if I take part in a study assessment.                                                                                                                                                                                                       |  |
| 4. I understand that all data will be stored to preserve confidentiality as described in the information sheet. I understand that nothing will be published in any research reports which could identify me.                                                                                                               |  |
| 5. I consent to the processing of my personal information for the purposes explained to me in the Privacy Notice. I understand that such information will be handled in accordance with the terms of the General Data Protection Regulation (GDPR) and the UK Data Protection Act 2018                                     |  |
| 6. I understand the information I provide Combat Stress for the purpose of this research study will be anonymised and shared with researchers at King's College London.                                                                                                                                                    |  |
| 7. I understand that the information I provide will be retained for a period of 10 years following completion of the study and then destroyed.                                                                                                                                                                             |  |
| 8. I agree to my post-treatment interview with a researcher being audio recorded.                                                                                                                                                                                                                                          |  |
| 9. I agree to my data from this interview being shared with a third-party transcriber who will have signed a confidentiality agreement.                                                                                                                                                                                    |  |
| 10. I agree to take part in the above study                                                                                                                                                                                                                                                                                |  |

Name of Participant

Date

Signature

Thank you for agreeing to take part in this research

When completed, 1 for patient; 1 for researcher site file; 1 (original) to be kept in medical notes.
