# Supplementary material
Source: HighWire-hosted journal article supplement (https://bmjopen.bmj.com/content/14/5/e082562)

Supplementary Material 2 Trauma Memory Perspective

The event(s) or experience(s) related to moral injury which have brought you to this treatment will be stored as images in your memory. Thinking about the image that you have in your mind (you can close your eyes if this is helpful), is your predominant impression one of viewing the situation as if looking out through your eyes, observing the details of what is going on around you, or is your predominant impression one in which you are observing yourself, that is, as if you were outside of yourself, looking at yourself from an external point of view? Please look at this scale and give me a rating of your perspective.

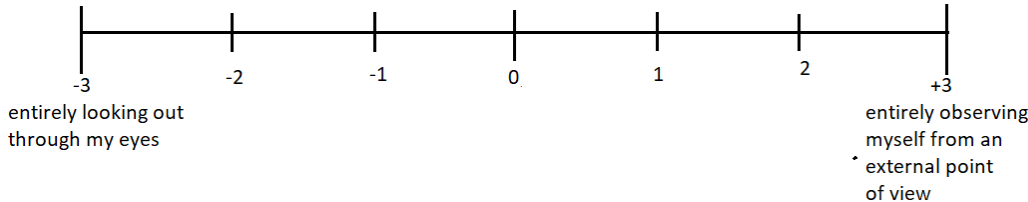

How clear is the image of the event(s) in your mind?

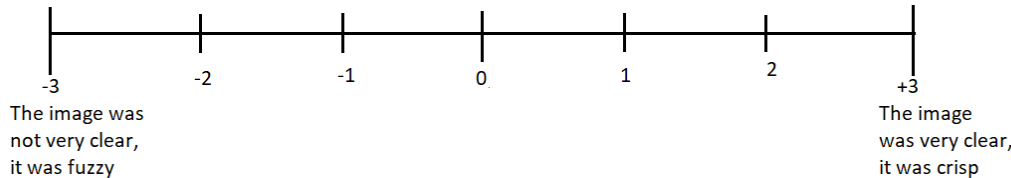

How much movement do you remember in the event(s)?

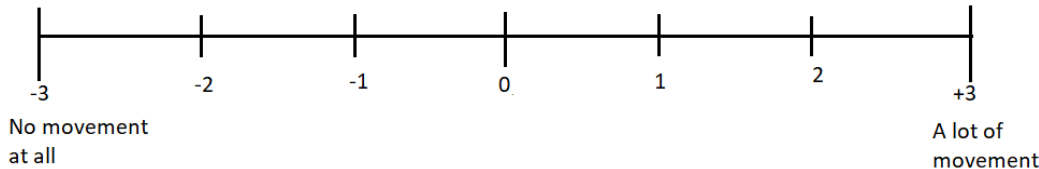

Supplement: inline-supplementary-material-2 [file inline-supplementary-material-2.pdf]
